# Supplementary material
Source: publisher figshare collection journal article supplement (https://acs.figshare.com/ndownloader/files/14349332)
Supplement: Supplementary file 1 [file 14349332]

## Supporting Information

# Proteomic sample preparation through extraction by unspecific adsorption on silica beads for ArgC-like digestion

Yannik Lewin<sup>1‡</sup>, Moritz Neupärtl<sup>1‡</sup>, Vahid Golghalyani<sup>1,2\*</sup> and Michael Karas<sup>1†</sup>

<sup>1</sup> Institute of Pharmaceutical Chemistry, Goethe-University, Frankfurt am Main 60438, Germany

<sup>2</sup> Biopharmaceutical Development, Analytical Sciences. MedImmune Ltd, Granta Park, Great Abington, CB21 6GH, United Kingdom

Mailto: [g.vahid@gmail.com](mailto:g.vahid@gmail.com)

<sup>‡</sup> Authors contributed equally

<sup>\*</sup> Author to whom correspondence should be addressed: +44 20 374 96358

**For supporting tables S1-S10, please consult the respective Excel file.**

**Peptide lists are provided separately as XLSX files, archived in one ZIP file to minimize file size.**

## Table of content

|                                                                                    |    |
|------------------------------------------------------------------------------------|----|
| Protein extraction.....                                                            | 3  |
| S1 Extraction performance of silica beads analyzed with SDS PAGE.....              | 3  |
| Comparison ABP, FASP and AP-IS.....                                                | 5  |
| S2 Comparison of distributions regarding GRAVY score and isoelectric points .....  | 5  |
| S3 Distribution of peptide lengths of identified proteins .....                    | 5  |
| S4 Oxidation rates of methionine.....                                              | 6  |
| S5 Physicochemical qualities of exclusive peptides .....                           | 7  |
| Performance of ArgC-like digestion.....                                            | 8  |
| S6 Overlaps of identified proteins .....                                           | 8  |
| S7 Comparison of GRAVY scores and IPs.....                                         | 9  |
| S8 Physicochemical qualities of tryptic and ArgC-like peptides .....               | 10 |
| Data Analysis .....                                                                | 11 |
| S9 Database search (KNIME workflow) .....                                          | 11 |
| S10 Determination of subcellular location and histone count (KNIME WORKFLOW) ..... | 11 |
| Protocols provided by manufacturers.....                                           | 12 |
| Pierce™ BCA Protein Assay Kit (Thermo Scientific) .....                            | 12 |
| Gel staining solutions .....                                                       | 13 |
| Coomassie Blue .....                                                               | 13 |
| SYPRO Ruby .....                                                                   | 13 |
| FASP Protein Digestion Kit (Expedeon).....                                         | 14 |
| Magnetic Beads .....                                                               | 15 |
| NHS-Beads (Bioclone) – Protein immobilization .....                                | 15 |
| Aldehyde-Beads (Bioclone).....                                                     | 15 |
| Silica beads (Bioclone) .....                                                      | 15 |

## Protein extraction

### S1 Extraction performance of silica beads analyzed with SDS PAGE

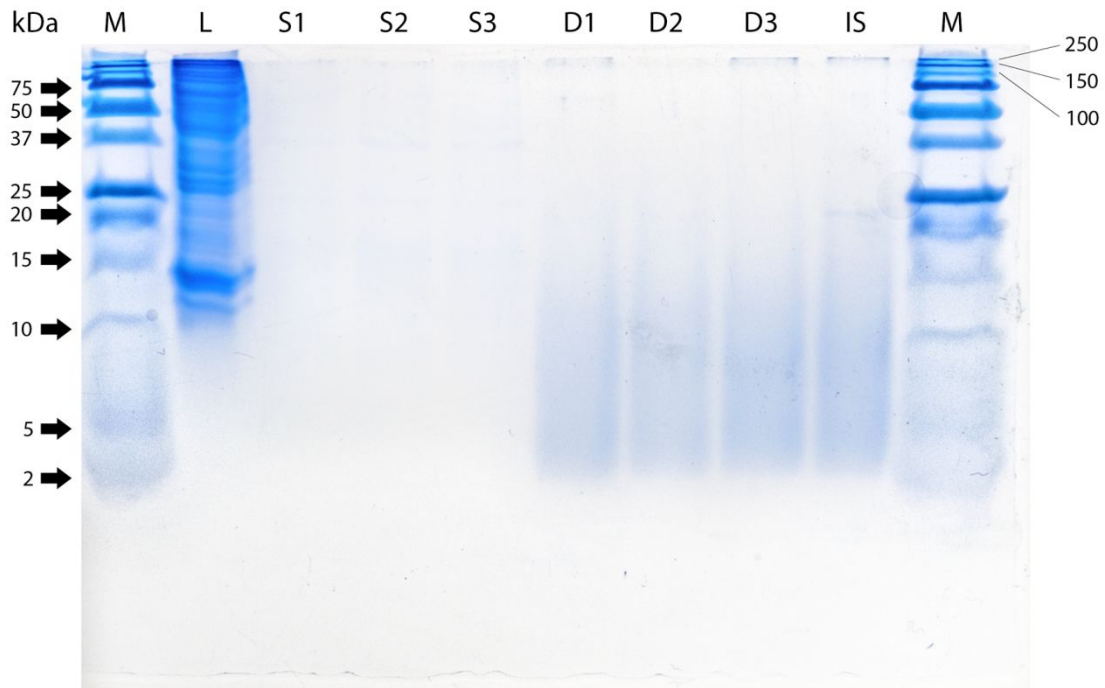

**Figure S1**

Cells were harvested and lysed with urea solution (sup. table S1) as described in materials and methods. Triplicates of lysates were incubated on magnetic silica beads and the supernatant was saved for analysis (S1-S3). The protein on the beads was digested with trypsin (overnight, 37°C) and the supernatant/peptide mixture collected (D1-D3). Lysate (L) and supernatant (S1-3; D1-3) volume equivalent to 20µg protein was applied to the gel electrophoresis.

Tryptic digestion on silica beads of HEK 293T cell lysate. SDS PAGE with 12% polyacrylamide (PAA) gel stained with Coomassie Blue. Peptides from the supernatant after digestion are seen in D1-D3 and in IS (in-solution digest, control) at 15-2 kDa. A faint trypsin band can be seen for IS (~23 kDa), but not for D1-D3, suggesting that trypsin remains on the silica surface.

## Comparison ABP, FASP and AP-IS

### S2 Comparison of distributions regarding GRAVY score and isoelectric points

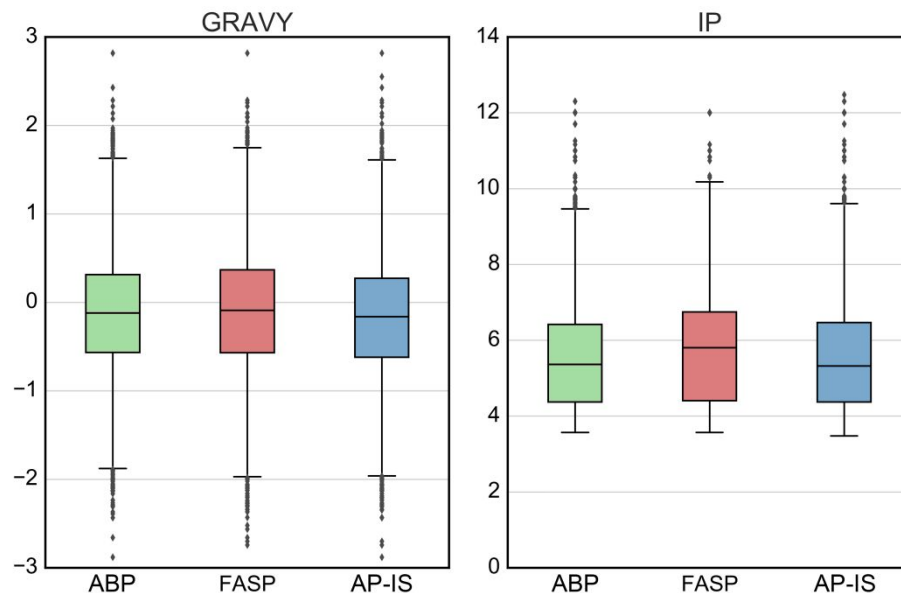

**Figure S2** – Comparisons of Gravy scores and isoelectric points between proteins identified after FASP, ABP and AP/IS

### S3 Distribution of peptide lengths of identified proteins

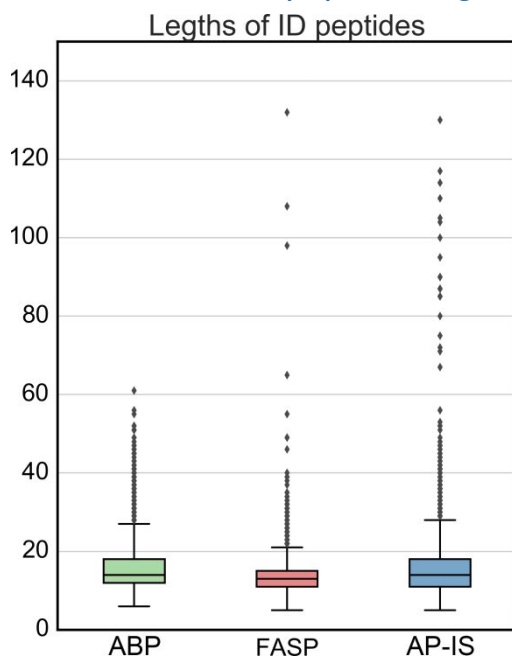

**Figure S3** – Peptide lengths were calculated in numbers of amino acids

## S4 Oxidation rates of methionine

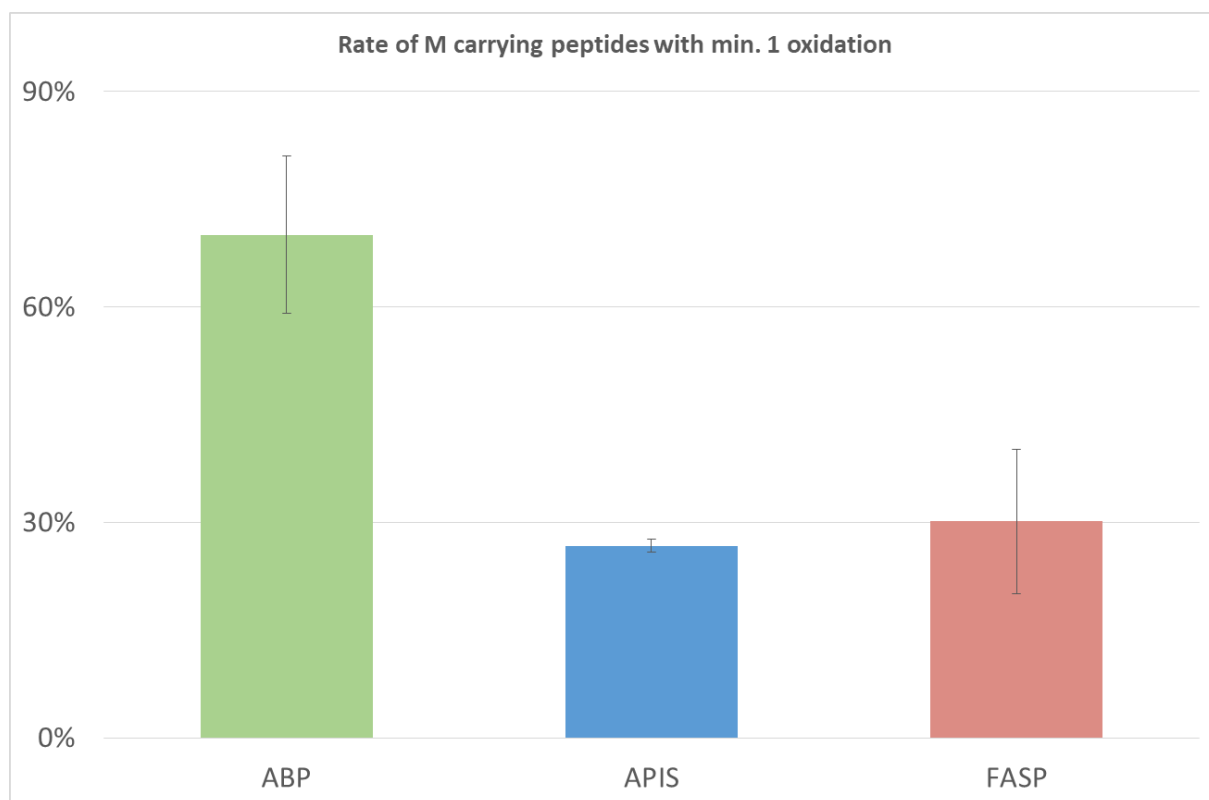

**Figure S4:** Oxidation rate of methionines. The rate of peptides carrying methionines (M) of which at least one oxidized was calculated in comparison to FASP and AP-IS.

## S5 Physicochemical qualities of exclusive peptides

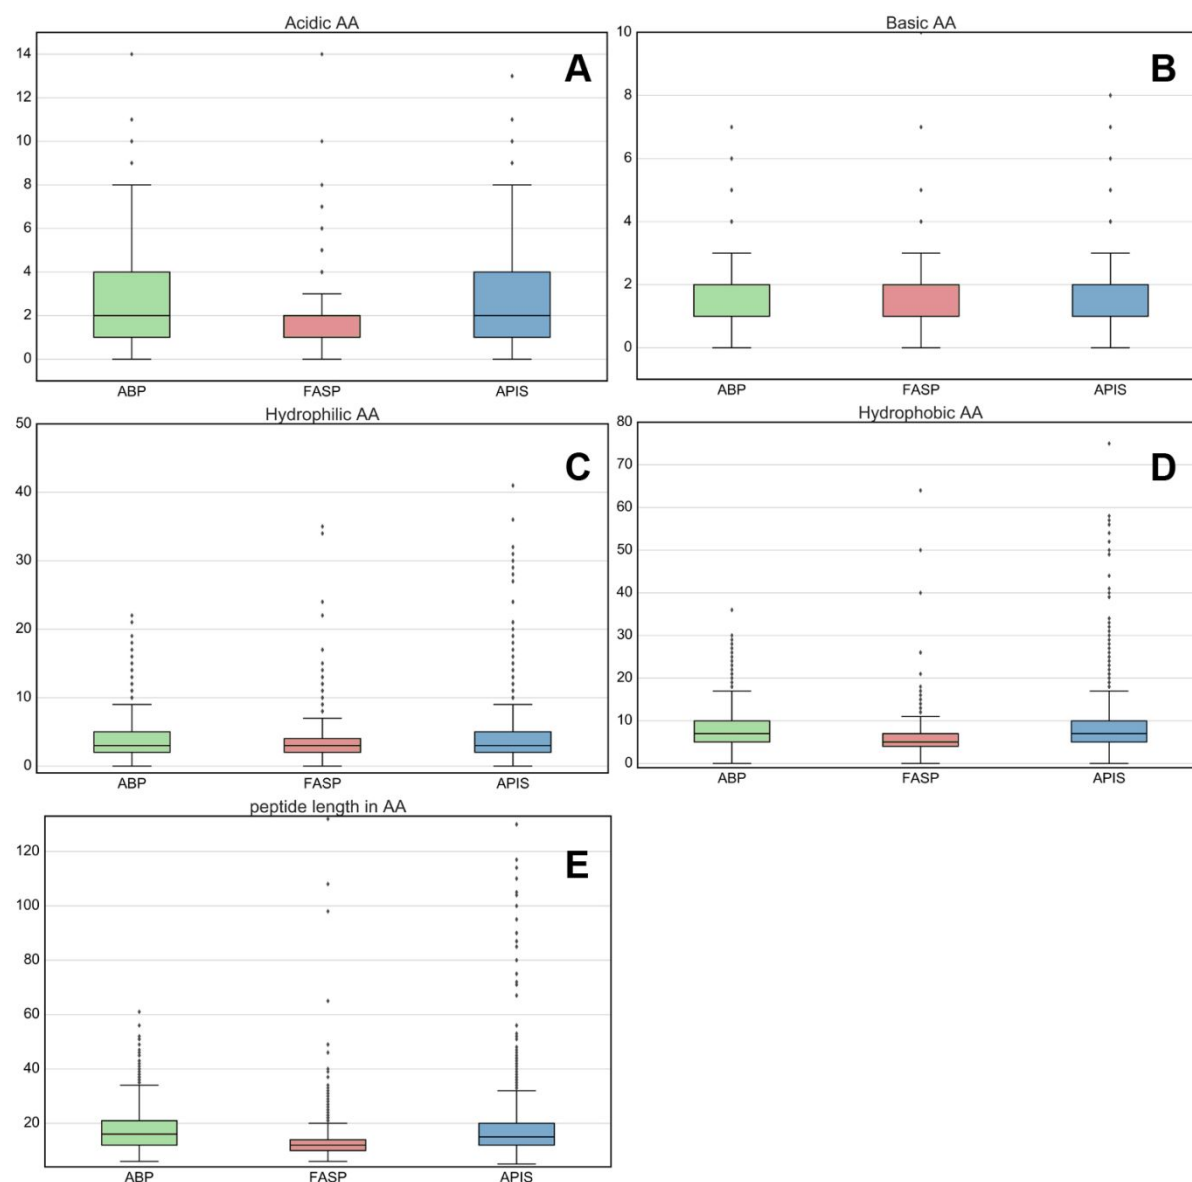

**Figure S5:** Physicochemical qualities of exclusive peptides. Peptides exclusive to each approach have been analyzed for their amino acid (AA) composition and therefore physicochemical attributes. Total amount of acidic (A) and basic (B) amino acids. Hydrophilic (C) or hydrophobic (D) tendencies as well as the overall peptide length (E) were compared.

## Performance of ArgC-like digestion

### S6 Overlaps of identified proteins

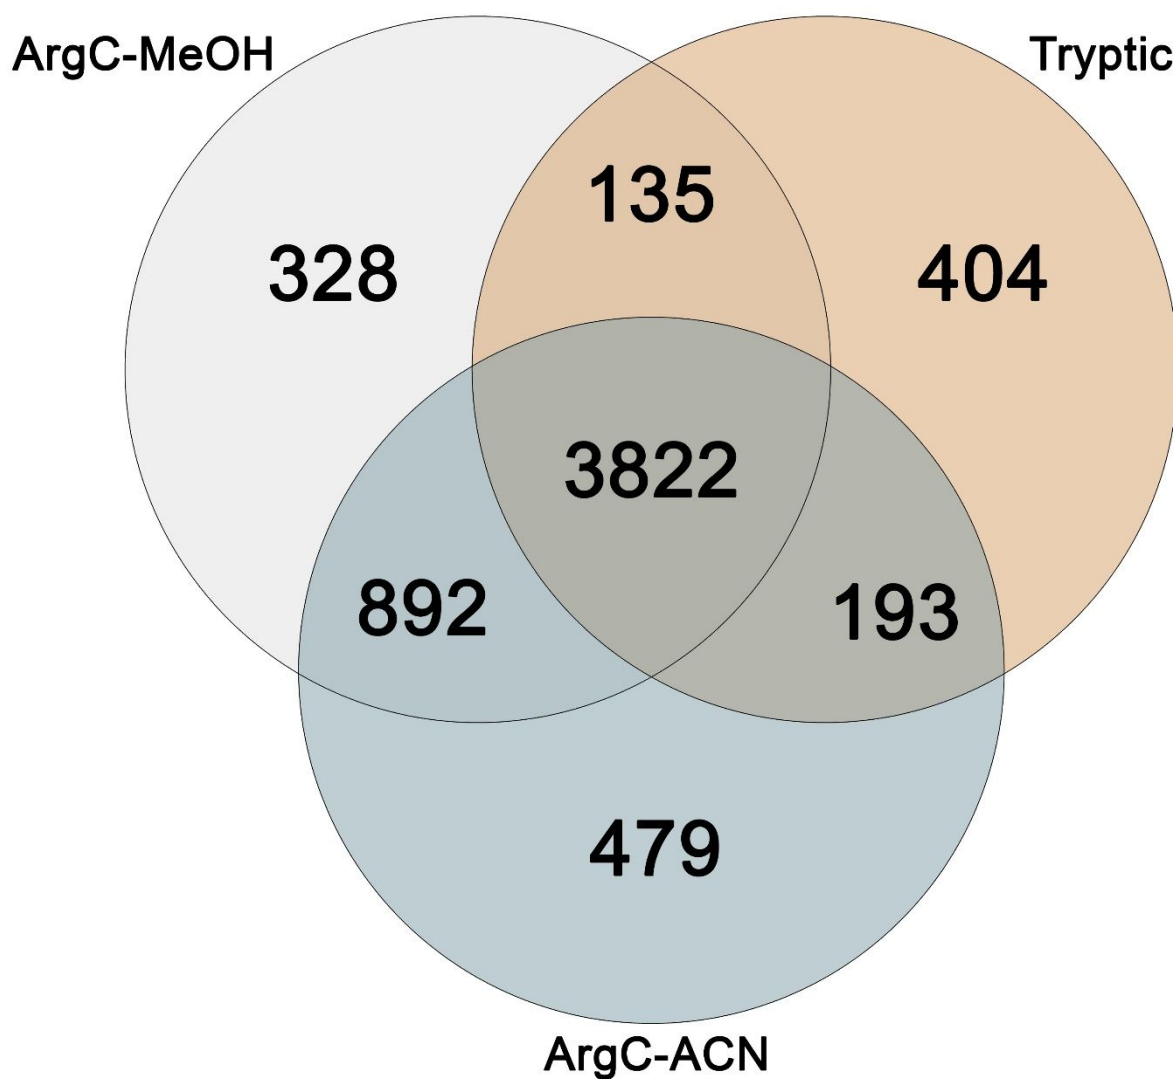

**Figure S6** - Venn diagram of all identified proteins for each protocol. Intersection of proteins identified in total among all three approaches (Tryptic, ArgC-like in methanol and ArgC-like in acetonitrile)

## S7 Comparison of GRAVY scores and IPs

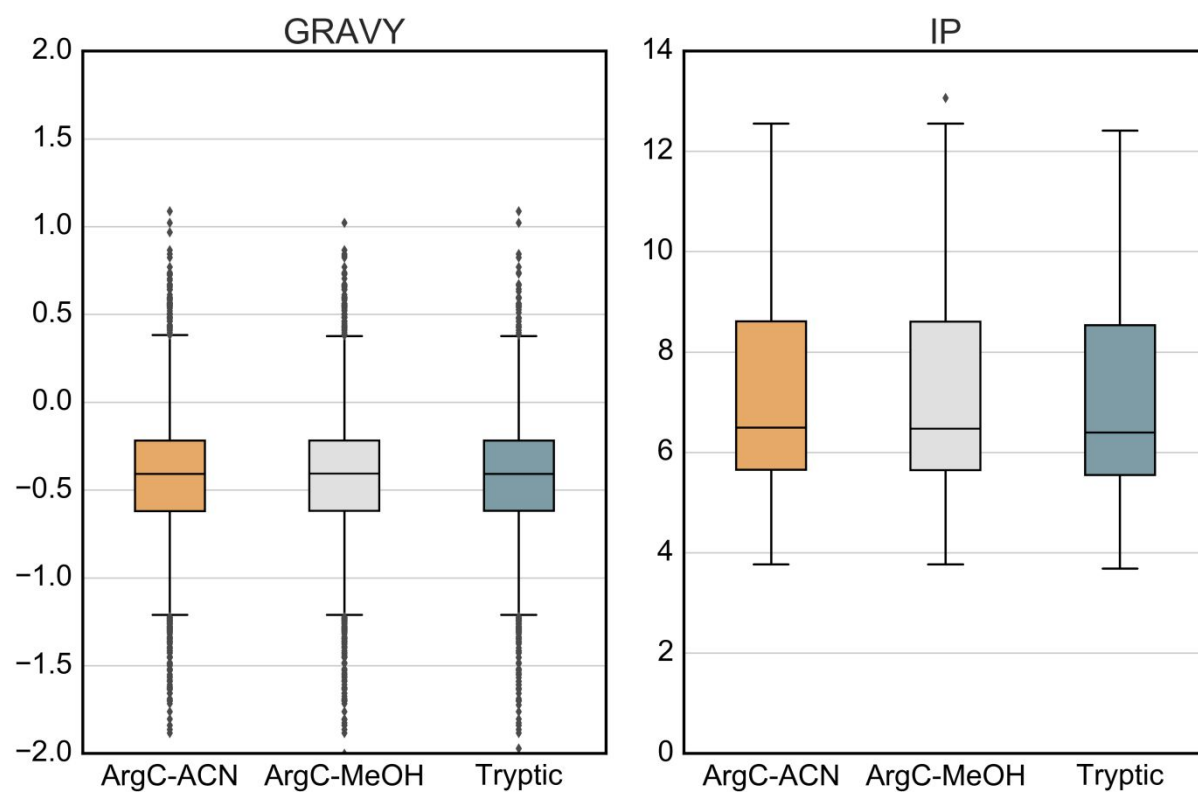

**Figure S7** - Analysis of potential differences in identified proteins regarding GRAVY score and isoelectric points (IP) when comparing ArgC-like approaches with tryptic digestion.



## S8 Physicochemical qualities of tryptic and ArgC-like peptides

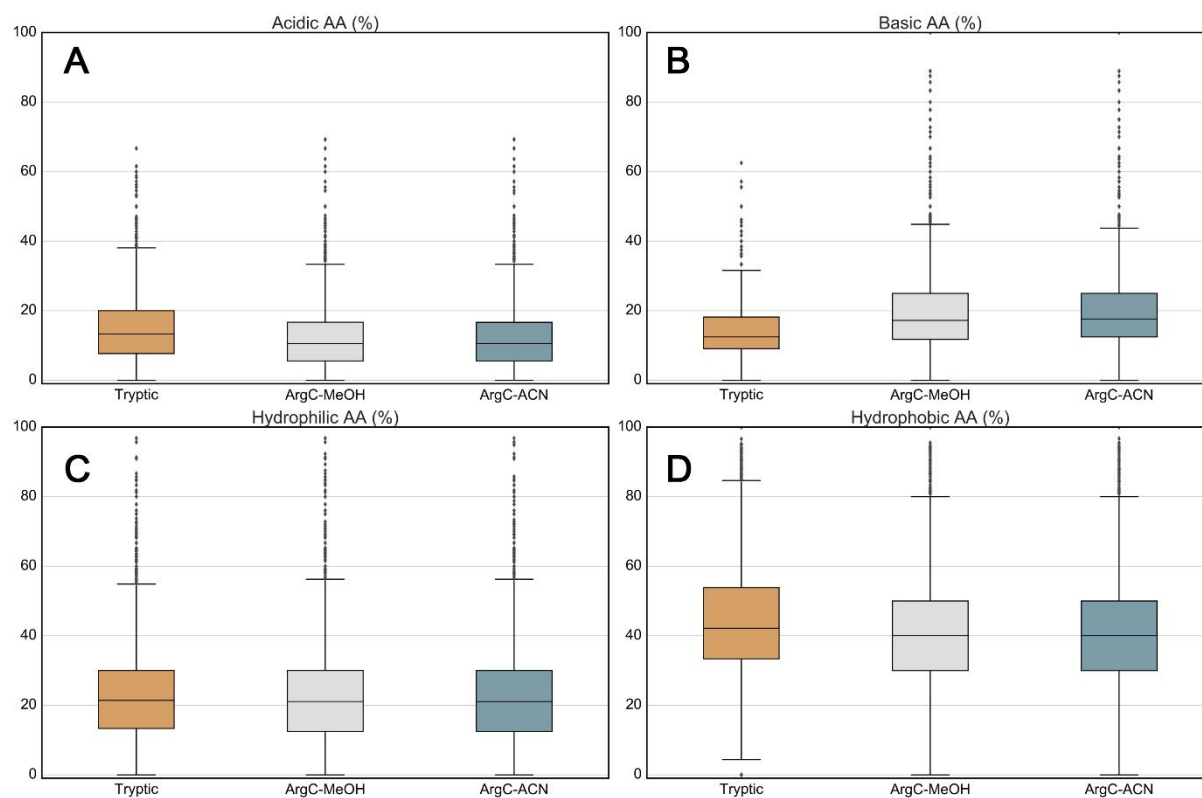

**Figure S8** - Peptide composition by amino acid (AA) characteristics:

Percentage of Acidic Amino Acids (A), Basic AA (B), Hydrophilic AA (C) and Hydrophobic AA (D)

## Data Analysis

### S9 Database search (KNIME workflow)

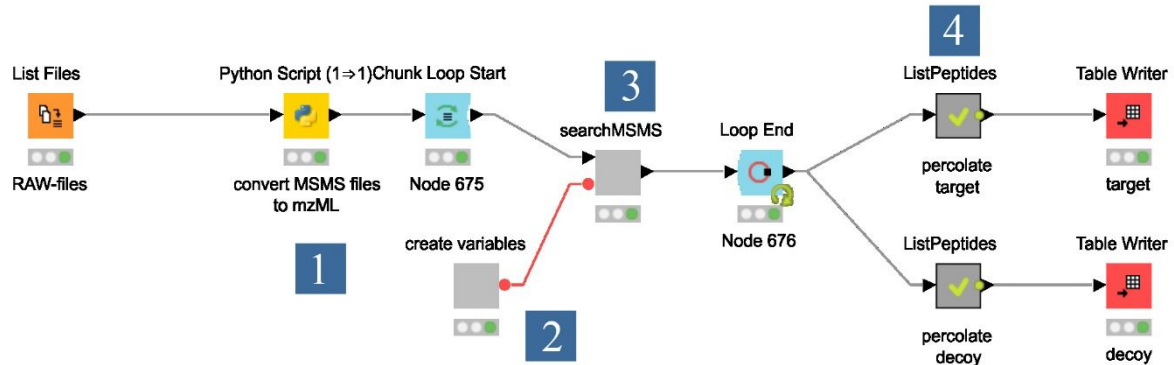

**Figure S9:** Mascot database search and percolation as streamlined in KNIME

1. RAW file were converted to open source file format mzML via MSConvert (Mascot)
2. Search parameters of table S1 were applied to the database search
3. Mascot search was performed successively for each file
4. Peptide lists were percolated and saved as tables (Supp. Lists: /Peplists)

### S10 Determination of subcellular location and histone count (KNIME WORKFLOW)

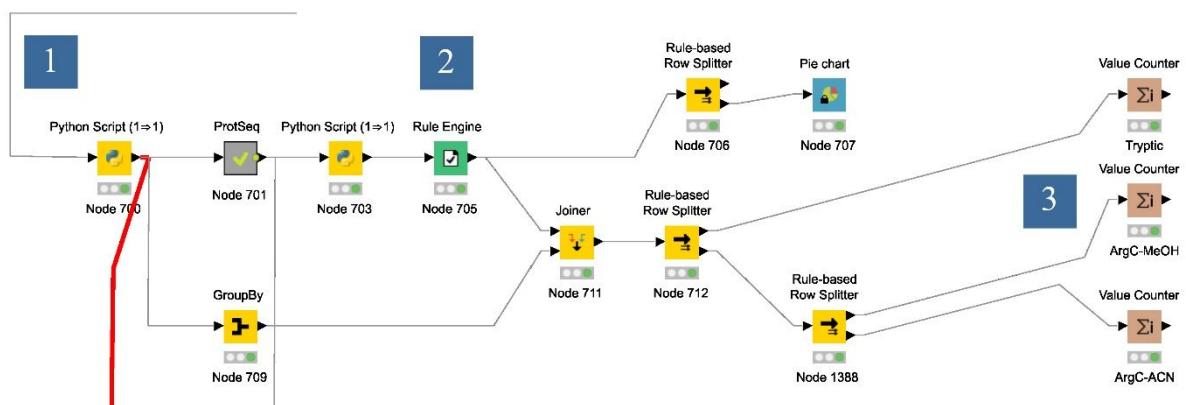

**Figure S10:** KNIME workflow associating identified proteins with subcellular tags

1. Combined Peptide list (all protocols) joined with dat (Mascot) file
2. Subcellular location entry extracted from dat-file and assigned as tag

3. Tag count for each protocol separately, produced lists in Supp. Lists: /Origins

An equivalent procedure was performed for histone tags

## Protocols provided by manufacturers

### Pierce™ BCA Protein Assay Kit (Thermo Scientific)

Dilution scheme for BSA Standard

| Dilution Scheme for Standard Test Tube Protocol and Microplate Procedure (Working Range = 20-2,000µg/mL) |                          |                                 |                                |
|----------------------------------------------------------------------------------------------------------|--------------------------|---------------------------------|--------------------------------|
| <b>Vial</b>                                                                                              | <b>Volume of Diluent</b> | <b>Volume and Source of BSA</b> | <b>Final BSA Concentration</b> |
|                                                                                                          | <b>(µL)</b>              | <b>(µL)</b>                     | <b>(µg/mL)</b>                 |
| A                                                                                                        | 0                        | 300 of Stock                    | 2000                           |
| B                                                                                                        | 125                      | 375 of Stock                    | 1500                           |
| C                                                                                                        | 325                      | 325 of Stock                    | 1000                           |
| D                                                                                                        | 175                      | 175 of vial B dilution          | 750                            |
| E                                                                                                        | 325                      | 325 of vial C dilution          | 500                            |
| F                                                                                                        | 325                      | 325 of vial E dilution          | 250                            |
| G                                                                                                        | 325                      | 325 of vial F dilution          | 125                            |
| H                                                                                                        | 400                      | 100 of vial G dilution          | 25                             |
| I                                                                                                        | 400                      | 0                               | 0 = Blank                      |

- Preparation of working reagent (WR) by mixing 50 parts of BCA Reagent A with 1 part of BCA Reagent B
- Pipette 10µL of each standard or unknown sample replicate into a microplate well (working range = 125-2000µg/mL)
- Add 200µL of the WR to each well and mix plate thoroughly on a plate shaker for 30 seconds.
- Cover plate and incubate at 37°C for 30 minutes.
- Cool plate to RT.
- Measure the absorbance at or near 562nm on a plate reader (TECAN, see materials and methods)

## Gel staining solutions

### Coomassie Blue

1. After electrophoresis, place the gel into a clean container with 100 mL of fix solution (50% methanol, 7% acetic acid) and agitate on an orbital shaker for 30 minutes. Repeat once more with fresh fix solution. Pour off the used fix solution.
2. Stain gel with Coomassie Blue solution (See sup. table S1) overnight
3. Destaining with (40% methanol, 10% acetic acid) until bands are clearly visible, replenish when necessary
4. Transfer to a new container and store in 5% acetic acid

### SYPRO Ruby

1. After electrophoresis, place the gel into a clean container with 100 mL of fix solution (50% methanol, 7% acetic acid) and agitate on an orbital shaker for 30 minutes. Repeat once more with fresh fix solution. Pour off the used fix solution.
2. Add 60 mL of SYPRO Ruby gel stain. Agitate on an orbital shaker overnight
3. Transfer the gel to a clean container and wash in 100 mL of wash solution (10% methanol, 7% acetic acid) for 30 minutes.

## FASP Protein Digestion Kit (Expedeon)

1. Mix up to 30  $\mu$ L (0.4 mg) of a protein extract with 200  $\mu$ L of Urea Sample Solution (provided in the kit) in the Spin Filter and centrifuge at 14,000 x g for 15 min.
2. Add 200  $\mu$ L of Urea Sample Solution to the Spin Filter and centrifuge at 14,000 x g for 15 min.
3. Discard the flowthrough from the collection tube
4. Add 10  $\mu$ L 10X Iodoacetamide Solution (provided in the Kit) and 90  $\mu$ L Urea Sample Solution to the Spin Filter and vortex for 1 min; incubate without mixing for 20 min in the dark.
5. Centrifuge the Spin Filter at 14,000 x g for 10 min.
6. Add 100  $\mu$ L of Urea Sample Solution to the Spin Filter and centrifuge at 14,000 x g for 15 min.
7. Repeat this step twice. Discard the flowthrough from the collection tube.
8. Add 100  $\mu$ L of 50 mM Ammonium Bicarbonate Solution provided with the FASP Kit to the Spin Filter and centrifuge at 14,000 x g for 10 min. Repeat this step twice.
9. Add 75  $\mu$ L Digestion Solution (enzyme to protein ratio 1:100) and vortex for 1 min. Wrap the tops of the tubes with Parafilm to minimize the effects from evaporation.
  - Digestion has been carried out with the same trypsin solution and the same volume as AP-IS and ABP (trypsin:protein 1:100)
10. Incubate the Spin Filter in an incubator at 37°C for 4 –18 h.
11. Transfer the Spin Filter to a new collection tube.
12. Add 40  $\mu$ L of 50 mM Ammonium Bicarbonate Solution. Centrifuge the Spin Filter at 14,000 x g for 10 min. Repeat this step once.
13. Add 50 $\mu$ L 0.5 M Sodium Chloride Solution provided with the FASP Kit and centrifuge the Spin Filter at 14,000 x g for 10 min.
14. Filtrate contains digested proteins. Acidify the filtrate with TFA to the desired pH and desalt.

## Magnetic Beads

### NHS-Beads (Bioclone) – Protein immobilization

Blocking of reactive surface groups was done as described in steps 5-6

16. Combine the protein solution and magnetic beads. Resuspend the magnetic beads and mix very well by pipetting or vortexing. Incubate the reaction with continuous rotation at room temperature for 4-6 hours or overnight.
17. Place the tube on the magnetic separator for 1-3 minutes. Remove the supernatant while the tube remains on the separator.
18. Remove the tube from the separator and resuspend the beads with 1 ml wash buffer by vortex for 30 seconds. Place the tube on the magnetic separator for 1-3 minutes. Remove the supernatant while the tube remains on the separator.
19. Wash beads 3-4 times with 1 ml wash buffer (or 1 M NaCl) as described above.
20. Add 0.5-1ml blocking buffer to the beads and incubate at room temperature for 1 hour or at 4 °C overnight.
21. Beads can be resuspended in any buffer after removing the supernatant

### Aldehyde-Beads (Bioclone)

Blocking of reactive surface groups was done as described in steps 4-6

1. In a fume hood, combine protein solution, 10 $\mu$ L NaCNBH<sub>3</sub> solution (10 $\mu$ L per milliliter of total volume, final concentration 50 mM) and magnetic beads.
2. Resuspend the magnetic beads and mix very well by pipeting. Incubate the reaction with continuous rotation at room temperature or 4°C overnight.
3. Wash beads 3 times with 1 ml Coupling buffer (0.1 M sodium phosphate, pH 7.0)
4. Add 0.5-1ml blocking buffer (1 M Tris•HCl, 0.05% NaN<sub>3</sub>, pH 7.4) and 5-10 $\mu$ L NaCNBH<sub>3</sub> solution (10 $\mu$ L per milliliter of total volume, final concentration 50 mM) to the beads and incubate at room for 1 hour or at 4°C overnight.
5. Wash beads 4-6 times with 1 ml Washing buffer (1 M NaCl, 0.05% NaN<sub>3</sub>)
6. Beads can be resuspended in any buffer after removing the supernatant

### Silica beads (Bioclone)

Silica beads were used as described in the manuscript after optimization experiments.

## Further supporting content

*The listed supporting tables are provided in the respective Excel file*

### **Supporting tables (SuppTables.xlsx):**

|           |                                                                                                                                                                                   |
|-----------|-----------------------------------------------------------------------------------------------------------------------------------------------------------------------------------|
| Table S1  | Reagents, buffers and solutions prepared in-house                                                                                                                                 |
| Table S2  | Mascot Search parameters                                                                                                                                                          |
| Table S3  | Missed cleavages and False discovery rates (comparison ABP, AP/IS, FASP)<br>S3a IDs and FDRs<br>S3b MCs (all peptides)<br>S3b MCs (exclusive peptides)<br>S3d Protein ID overlaps |
| Table S4  | Methionine oxidation rate                                                                                                                                                         |
| Table S5  | Carbamylation rate of lysines                                                                                                                                                     |
| Table S6  | Missed cleavages and False discovery rates (comparison Tryptic and ArgC-like)<br>S6a MCs<br>S6b IDs and FDRs                                                                      |
| Table S7  | Protein ID overlaps                                                                                                                                                               |
| Table S8  | Protein Origins<br>S8a Histones<br>S8b Cellular substructures                                                                                                                     |
| Table S9  | Hits above identity threshold                                                                                                                                                     |
| Table S10 | Precursor mass ranges                                                                                                                                                             |

### **Peptide lists (Peplists.zip):**

|                            |                                                                                 |
|----------------------------|---------------------------------------------------------------------------------|
| PEPLIST_ABP_FASP_APIS.xlsx | Peptides used for identification comparing ABP, FASP and AP/IS                  |
| PEPLIST_ArgClike.xlsx      | Peptides used for identification comparing ArgC-like and tryptic digestion      |
| PEPLIST_Carbamylation.xlsx | Peptides used for identification of competing variable modifications on lysine. |
